# Supplementary material
Source: PubMed Central journal article supplement (PMC8482293)
Supplement: jamacardiol-e213866-s002.pdf [file jamacardiol-e213866-s002.pdf]

| *Group Name(s): ART Investigators |                |                       |                          |                                                                                               |                                          |                                                         |                                                                                            |
|-----------------------------------|----------------|-----------------------|--------------------------|-----------------------------------------------------------------------------------------------|------------------------------------------|---------------------------------------------------------|--------------------------------------------------------------------------------------------|
| *First Name and Middle Initial(s) | *Last Name     | *Suffix (eg, Jr, III) | Academic Degrees         | Institution                                                                                   | Location (city, state/province, country) | Role or Contribution, eg, chair, principal investigator | Group (if more than 1 Group listed in the byline) and/or Subgroup (eg, Steering Committee) |
| David                             | Taggart        |                       | MD, PhD, FRCS, Professor | John Radcliffe Hospital                                                                       | Oxford, UK                               | Principal Investigator                                  |                                                                                            |
| Stan                              | Wos            |                       | MD                       | Medical University of Silesia (2nd Department of Cardiac Surgery)                             | Katowice, Poland                         | Principal Investigator                                  |                                                                                            |
| Marek                             | Jasinski       |                       | MD, FETCS                | Medical University of Silesia (2nd Department of Cardiac Surgery)                             | Katowice, Poland                         | Principal Investigator                                  |                                                                                            |
| Marek                             | Deja           |                       | MD, PhD                  | Medical University of Silesia (2nd Department of Cardiac Surgery)                             | Katowice, Poland                         | Principal Investigator                                  |                                                                                            |
| Vipin                             | Zamvar         |                       | MD, FRCS                 | Edinburgh Royal Infirmary                                                                     | Edinburgh, UK                            | Principal Investigator                                  |                                                                                            |
| Brian                             | Buxton         |                       | MD, Professor            | Austin and Repatriation Medical Centre                                                        | Melbourne, Australia                     | Principal Investigator                                  |                                                                                            |
| Siven                             | Seevanayagam   |                       | MD                       | Austin and Repatriation Medical Centre                                                        | Melbourne, Australia                     | Principal Investigator                                  |                                                                                            |
| Peter                             | O'Keefe        |                       | MBBS, FRCS               | University Hospital of Wales                                                                  | Cardiff, UK                              | Principal Investigator                                  |                                                                                            |
| The late Andy                     | Forsyth        |                       | MD                       | Royal Sussex County Hospital                                                                  | Brighton, UK                             | Principal Investigator                                  |                                                                                            |
| Uday                              | Trivedi        |                       | MBBS, FRCS (CTh), FECTS  | Royal Sussex County Hospital                                                                  | Brighton, UK                             | Principal Investigator                                  |                                                                                            |
| Stephen                           | Clark          |                       | Professor                | Freeman Hospital                                                                              | Newcastle, UK                            | Principal Investigator                                  |                                                                                            |
| Andrzej                           | Bochenek       |                       | MD                       | Medical University of Silesia (1st Department of Cardiac Surgery)                             | Katowice, Poland                         | Principal Investigator                                  |                                                                                            |
| Marek                             | Deja           |                       | MD, PhD                  | Medical University of Silesia (1st Department of Cardiac Surgery)                             | Katowice, Poland                         | Principal Investigator                                  |                                                                                            |
| Ragheb                            | Hasan          |                       | MBChB, ChM, FRCS (CTh)   | Royal Infirmary                                                                               | Manchester, UK                           | Principal Investigator                                  |                                                                                            |
| Jatin                             | Desai          |                       | MBChB, FRCS (CTh)        | King's College Hospital                                                                       | London, UK                               | Principal Investigator                                  |                                                                                            |
| Andy                              | Ritchie        |                       | MD, PhD                  | Papworth Hospital                                                                             | Cambridge, UK                            | Principal Investigator                                  |                                                                                            |
| Chris                             | Choong         |                       | MB BCh BAO, FRCS (CTh)   | Papworth Hospital                                                                             | Cambridge, UK                            | Principal Investigator                                  |                                                                                            |
| Sukumaran                         | Nair           |                       | MD, FRCS(CTh)            | Papworth Hospital                                                                             | Cambridge, UK                            | Principal Investigator                                  |                                                                                            |
| Catherine                         | Sudarshan      |                       | MD,FRCS(CTh)             | Papworth Hospital                                                                             | Cambridge, UK                            | Principal Investigator                                  |                                                                                            |
| Alexander                         | Cale           |                       | MD, FRCS (CTh)           | Castle Hill Hospital                                                                          | Hull, UK                                 | Principal Investigator                                  |                                                                                            |
| Tom                               | Spyt           |                       | MD, FRCS(CTh)            | Glenfield Hospital                                                                            | Leicester, UK                            | Principal Investigator                                  |                                                                                            |
| The late Anthony                  | Gershlick      |                       | MBBS, MRCP, FRCP         | Glenfield Hospital                                                                            | Leicester, UK                            | Principal Investigator                                  |                                                                                            |
| Jullien                           | Gaer           |                       | MS, FRCSEd, FRCS (CTh)   | Harefield Hospital                                                                            | London, UK                               | Principal Investigator                                  |                                                                                            |
| Jerzy                             | Sadowksi       |                       | MD                       | John Paul II Hospital                                                                         | Krakow, Poland                           | Principal Investigator                                  |                                                                                            |
| Boguslaw                          | Kapelak        |                       | MD, Professor            | John Paul II Hospital                                                                         | Krakow, Poland                           | Principal Investigator                                  |                                                                                            |
| Jerzy                             | Pacholewicz    |                       | MD, PhD                  | John Paul II Hospital                                                                         | Krakow, Poland                           | Principal Investigator                                  |                                                                                            |
| Fernando                          | Moraes         |                       | MD                       | Heart Institute of Pernambuco                                                                 | Recife, Brazil                           | Principal Investigator                                  |                                                                                            |
| John                              | Pepper         |                       | MD                       | Royal Brompton Hospital                                                                       | London, UK                               | Principal Investigator                                  |                                                                                            |
| Venkatachalam                     | Chandrasekaran |                       | FRCS (CTh), MS MBBS      | St George's Hospital                                                                          | London, UK                               | Principal Investigator                                  |                                                                                            |
| Rafal                             | Pawlaczyk      |                       | MD, PhD, DSc             | Medical University of Gdansk                                                                  | Gdansk, Poland                           | Principal Investigator                                  |                                                                                            |
| Gopi                              | Mannam         |                       | MBBS, FRCS               | Care Hospital                                                                                 | Hyderabad, India                         | Principal Investigator                                  |                                                                                            |
| Lokeswara                         | Rao Sajja      |                       | MBBS, MS                 | Care Hospital                                                                                 | Hyderabad, India                         | Principal Investigator                                  |                                                                                            |
| Norman                            | Briffa         |                       | MB, MD, FRCS             | Northern General Hospital                                                                     | Sheffield, UK                            | Principal Investigator                                  |                                                                                            |
| Riccardo                          | Casabona       |                       | MD                       | Ospedale Mauriziano                                                                           | Turin, Italy                             | Principal Investigator                                  |                                                                                            |
| Guglielmo                         | Actis Dato     |                       | MD                       | Ospedale Mauriziano                                                                           | Turin, Italy                             | Principal Investigator                                  |                                                                                            |
| Walid                             | Dihmis         |                       | MD                       | The Cardiothoracic Centre                                                                     | Liverpool, UK                            | Principal Investigator                                  |                                                                                            |
| Manoj                             | Kuduvalli      |                       | M.Ch, FRCS (CTh)         | The Cardiothoracic Centre                                                                     | Liverpool, UK                            | Principal Investigator                                  |                                                                                            |
| Lech                              | Anisimowicz    |                       | MD                       | Szpital Uniwersytecki                                                                         | Bydgoszcz, Poland                        | Principal Investigator                                  |                                                                                            |
| Bruno                             | Podesser       |                       | MD                       | Landeskrankenhaus, St Polten and Center for Biomedical Research, Medical University of Vienna | Vienna, Austria                          | Principal Investigator                                  |                                                                                            |
| Naresh                            | Trehan         |                       | MD                       | Escorts Heart Institute                                                                       | New Delhi, India                         | Principal Investigator                                  |                                                                                            |
| ZS                                | Meharwal       |                       | MD                       | Escorts Heart Institute                                                                       | New Delhi, India                         | Principal Investigator                                  |                                                                                            |
| Marian                            | Zembala        |                       | MD, PhD, FESC            | Silesian Centre for Heart Disease                                                             | Zabrze, Poland                           | Principal Investigator                                  |                                                                                            |
| Kaz                               | Widenka        |                       | MD, PhD                  | Szpital Wojewodzki 2                                                                          | Rzeszow, Poland                          | Principal Investigator                                  |                                                                                            |
